# Supplementary material
Source: publisher figshare collection journal article supplement (https://frontiersin.figshare.com/ndownloader/files/35276854)
Supplement: Supplementary file [file 35276854]

## Supplementary Material

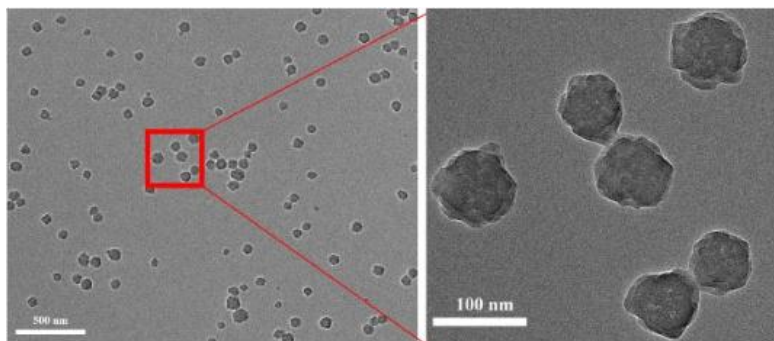

**Supplementary Figure 1.** TEM image of PB on different scale.

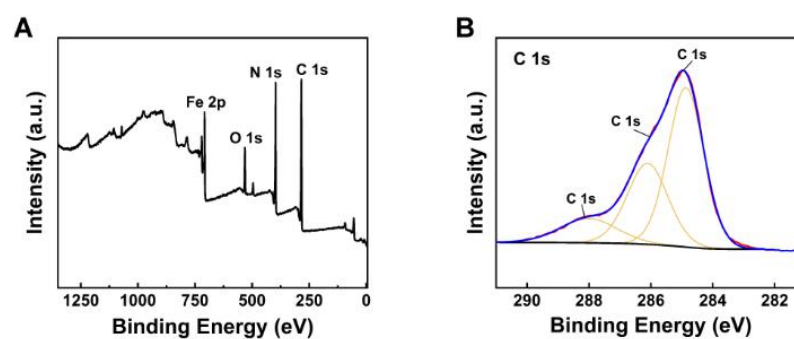

**Supplementary Figure 2.** XPS spectrum of all elements(A) and C 1s(B).

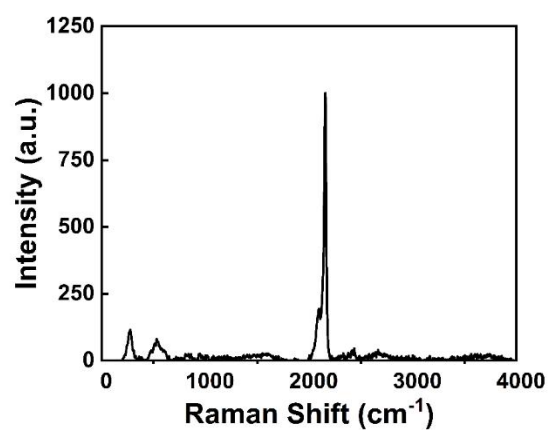

**Supplementary Figure 3.** Raman spectrum.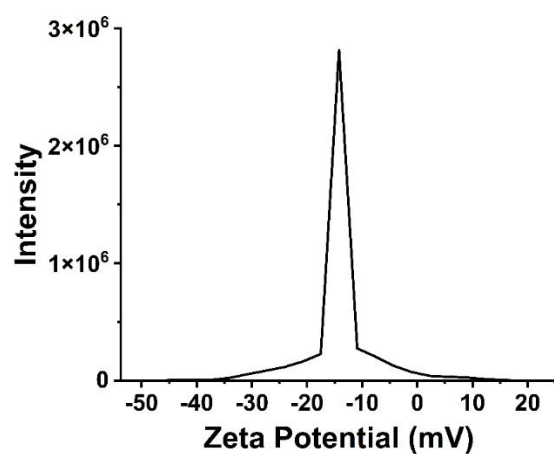**Supplementary Figure 4.** Zeta potentials.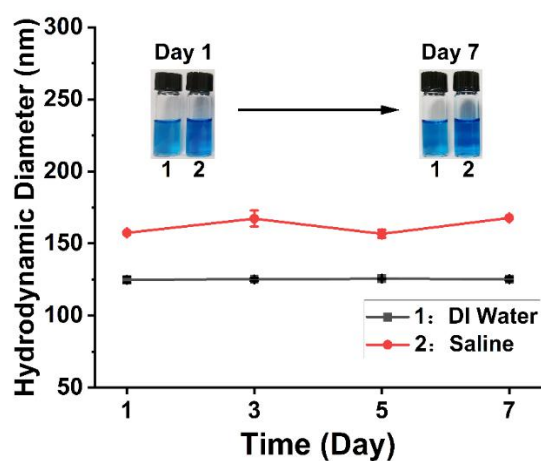**Supplementary Figure 5.** Changes in the hydrodynamic size of PB incubated in different media for 7 days.

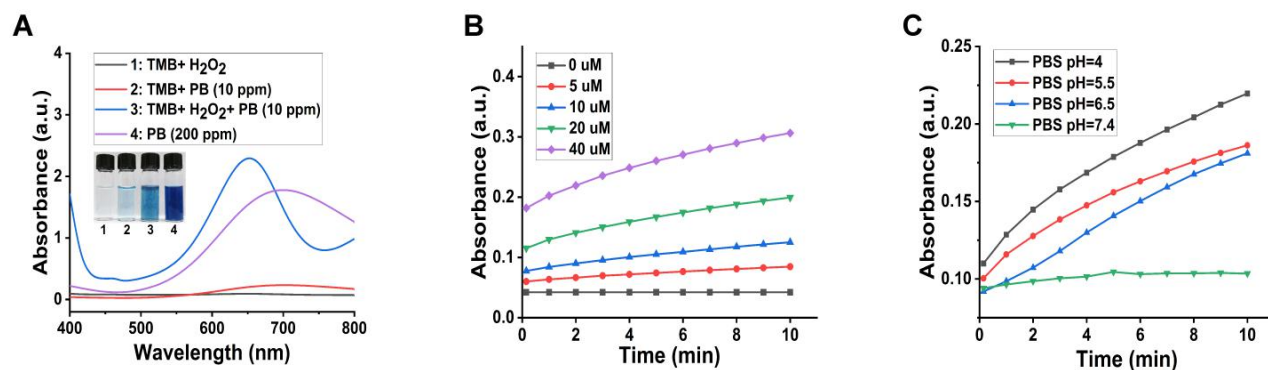

**Supplementary Figure 6. POD-like activity of PB.** (A) The absorbance curves of TMB/ H<sub>2</sub>O<sub>2</sub>+ PB of 400-800 nm wavelength (inset: Digital photo of TMB/ H<sub>2</sub>O<sub>2</sub>+ PB system). The time-dependent absorbance changes of TMB/ H<sub>2</sub>O<sub>2</sub>+ PB at 650 nm wavelength at various (B) PB concentrations (pH=5.5, TMB 100uM, H<sub>2</sub>O<sub>2</sub> 1mM), (C) pH (PB=20uM, TMB 100uM, H<sub>2</sub>O<sub>2</sub> 1mM).

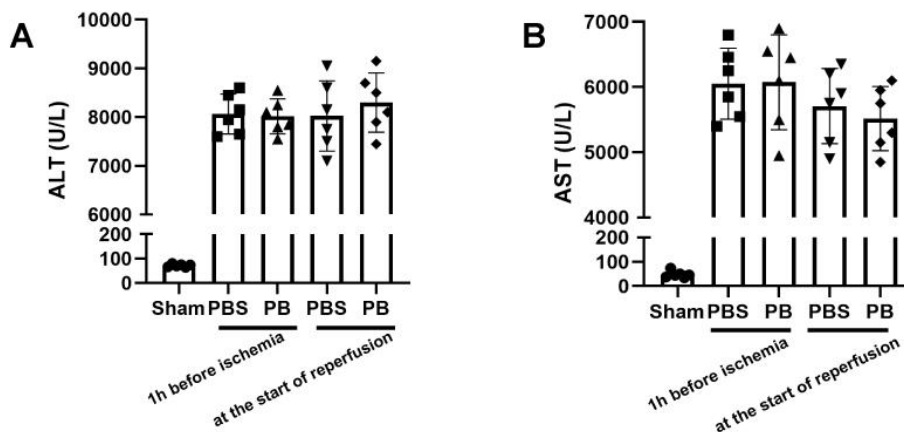

**Supplementary Figure 7.** Serum levels of ALT (A) and AST (B) from different treatment groups after 90 min of ischemia and 6 h of reperfusion (n=6).
